# Supplementary material for: Effect of Polyelectrolyte Mono- and Bilayer Formation on the Colloidal Stability of Layered Double Hydroxide Nanoparticles
Source: MDPI journal article supplement (doi:10.3390/nano8120986), 2018-11-28
Supplement: s1 [file s1]

## Supplementary Materials

for

### **Effect of Polyelectrolyte Mono and Bilayer Formation on the Colloidal Stability of Layered Double Hydroxide Nanoparticles**

**Zoltán Somosi,<sup>1,2</sup> Marko Pavlovic,<sup>1</sup> István Pálinkó<sup>3</sup> and István Szilágyi<sup>1,2,\*</sup>**

<sup>1</sup> MTA-SZTE Lendület Biocolloids Research Group, Department of Physical Chemistry and Materials Science, University of Szeged, H-6720 Szeged, Hungary

<sup>2</sup> Interdisciplinary Excellence Centre, Department of Physical Chemistry and Materials Science, University of Szeged, H-6720 Szeged, Hungary

<sup>3</sup> Material and Solution Structure Research Group, Department of Organic Chemistry, University of Szeged, H-6720 Szeged, Hungary

\* Correspondence: szistvan@chem.u-szeged.hu (I.S.)

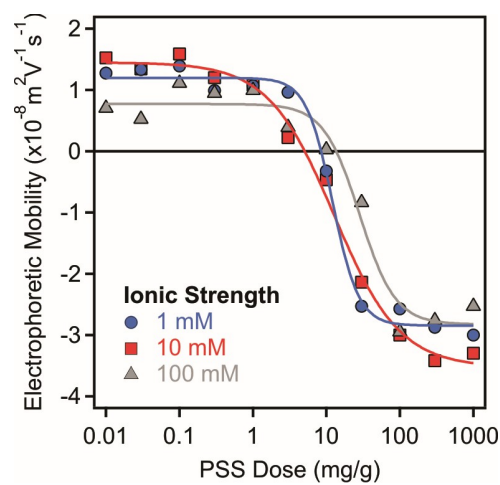

**Figure S1.** Electrophoretic mobilities of LDH particles as a function of the PSS dose at 1 mM (circles), 10 mM (squares) and 100 mM (triangles) ionic strengths adjusted by NaCl. The measurements were carried out at 10 mg/L particle concentration. The mg/g unit on the x-axis indicates mg PSS per one gram of LDH. The lines serve to guide the eyes.

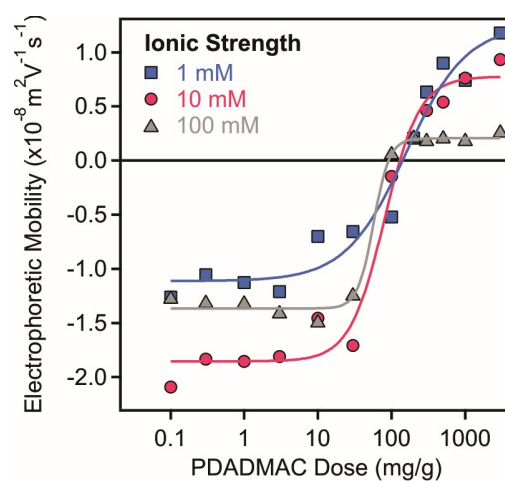

**Figure S2.** Electrophoretic mobilities of LDH-PSS particles as a function of the PDADMAC dose at 1 mM (squares), 10 mM (circles) and 100 mM (triangles) ionic strengths adjusted by NaCl. The measurements were carried out at 10 mg/L particle concentration. The mg/g unit on the x-axis indicates mg PDADMAC per one gram of LDH-PSS. The lines serve to guide the eyes.

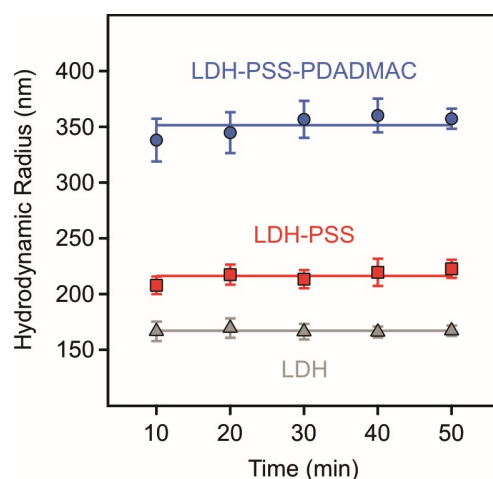

**Figure S3.** Hydrodynamic radii of bare LDH (triangles), LDH-PSS (squares) and LDH-PSS-PDADMAC (circles) particles versus time at 3 mM ionic strength. Each data point is the average of 10 hydrodynamic radii measured in time-resolved DLS experiment. A PSS dose of 100 mg/g and PDADMAC of 300 mg/g was applied in the composite particles. The solid lines are linear fits, where the slope was set to zero.
